# Supplementary material for: Resident microbial communities inhibit growth and antibiotic-resistance evolution of Escherichia coli in human gut microbiome samples
Source: PLOS journal article supplement (doi:10.1371/journal.pbio.3000465), 2020-04-20
Supplement: S10 (10.1371/journal.pbio.3000465.s010) [file journal.pbio.3000465.s010]

**S2 Table: Fraction of focal strain on total *E.coli* abundance determined by qPCR and a mixed calculation based of colony PCR, flow cytometry and amplicon data.** *Treatment* and *Human donor* indicate the same experimental groups as in Sup. table 1. *Time point* gives the time after the start of the experiment when the samples were isolated. Frequency of the focal strain compared to total *E. coli* abundance was either determined by qPCR with primers specific for focal strain and *E.coli* or a mixed calculation of abundance of focal strain based on colony PCR, total bacterial abundance measured by flow cytometry and total *E. coli* frequency based on amplicon data. *E.coli* frequency based on total Enterobacteriaceae abundance was determined by reads distribution of the amplicon sequencing results. Frequencies shown are mean values of three replicates and the standard deviation.

|            |             |                | Frequency of focal strain compared to total <i>E. coli</i> abundance based on |                                                                 | <i>E.coli</i> frequency of total Enterobacteriaceae based on |
|------------|-------------|----------------|-------------------------------------------------------------------------------|-----------------------------------------------------------------|--------------------------------------------------------------|
| Treatment  | Human donor | Time point [h] | qPCR<br>(mean % $\pm$ s.d. )                                                  | Colony PCR/ Flow cytometer/<br>amplicon<br>(mean % $\pm$ s.d. ) | Amplicon<br>(mean % $\pm$ s.d. )                             |
| +Comm -Amp | 1           | 24             | 20.9 $\pm$ 3.1                                                                | 66.9 $\pm$ 5.9                                                  | 99.997 $\pm$ 0.003                                           |
| +Comm +Amp | 1           | 24             | 0.2 $\pm$ 0.1                                                                 | 0.1 $\pm$ 0.03                                                  | 99.93 $\pm$ 0.007                                            |
| +Comm -Amp | 2           | 24             | 35.1 $\pm$ 11.1                                                               | 27.9 $\pm$ 8.3                                                  | 99.97 $\pm$ 0.02                                             |
| +Comm +Amp | 2           | 24             | 0.07 $\pm$ 0.1                                                                | 0.004 $\pm$ 0.004                                               | 99.99 $\pm$ 0.006                                            |
| +Comm -Amp | 3           | 24             | 18.6 $\pm$ 0.6                                                                | 16.6 $\pm$ 3.8                                                  | 99.999 $\pm$ 0.001                                           |
| +Comm +Amp | 3           | 24             | 12.9 $\pm$ 2.6                                                                | 8.6 $\pm$ 2.5                                                   | 99.998 $\pm$ 0.004                                           |
| +Comm -Amp | 1           | 168            | ND                                                                            | 0                                                               | 100 $\pm$ 0.001                                              |
| +Comm +Amp | 1           | 168            | ND                                                                            | 0                                                               | 99.999 $\pm$ 0.001                                           |
| +Comm -Amp | 2           | 168            | 9.6 $\pm$ 0.1                                                                 | 32.9 $\pm$ 2.5                                                  | 99.773 $\pm$ 0.2                                             |
| +Comm +Amp | 2           | 168            | 0.02 $\pm$ 0.001                                                              | 0.0001 $\pm$ 0.0001                                             | 99.474 $\pm$ 0.64                                            |
| +Comm -Amp | 3           | 168            | 9.4 $\pm$ 7.0                                                                 | 23.3 $\pm$ 5.6                                                  | 99.996 $\pm$ 0.007                                           |
| +Comm +Amp | 3           | 168            | ND                                                                            | 0                                                               | 99.992 $\pm$ 0.01                                            |
